# Supplementary material
Source: publisher figshare collection journal article supplement (https://acs.figshare.com/ndownloader/files/5135590)
Supplement: Supplementary file 1 [file 5135590]

## Supporting Information:

**Table S1.** The H-bonds in the structure of **FJ-17**

| D-H $\cdots$ A       | <i>d</i> (D-H) | <i>d</i> (H $\cdots$ A) | <i>d</i> (D $\cdots$ A) | $\angle$ (DHA) |
|----------------------|----------------|-------------------------|-------------------------|----------------|
| N1-H1D $\cdots$ O11  | 0.89           | 1.88                    | 2.762(5)                | 173.3          |
| N1- H1E $\cdots$ O12 | 0.89           | 2.11                    | 2.974(5)                | 162.6          |
| N3- H3A $\cdots$ O1  | 0.89           | 2.13                    | 2.964(5)                | 155.1          |
| N3- H3A $\cdots$ O10 | 0.89           | 2.16                    | 2.847(5)                | 134.1          |
| N3- H3B $\cdots$ O3  | 0.89           | 2.01                    | 2.837(5)                | 153.4          |
| N3- H3C $\cdots$ O2  | 0.89           | 2.19                    | 2.909(5)                | 137.7          |

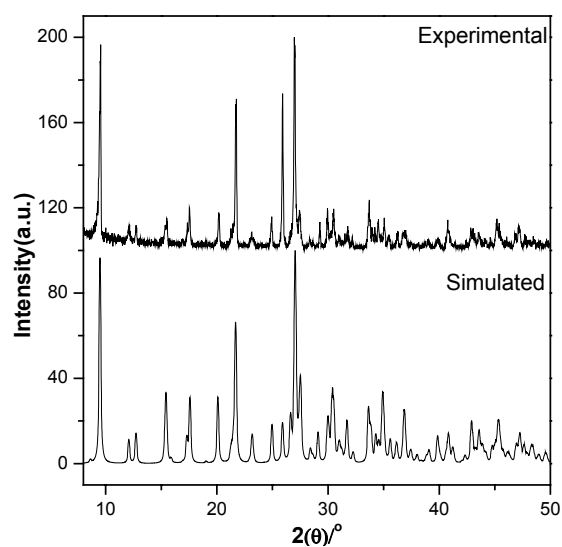

**Figure S1.** Experimental and simulated X-ray powder diffraction pattern of **FJ-17**.

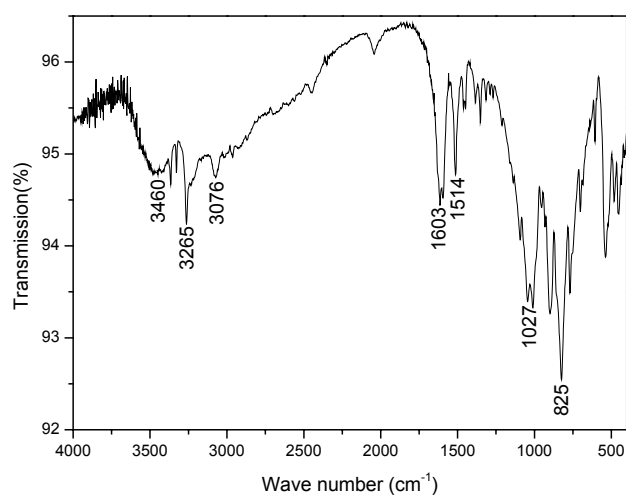

**Figure S2.** IR curve of **FJ-17**.

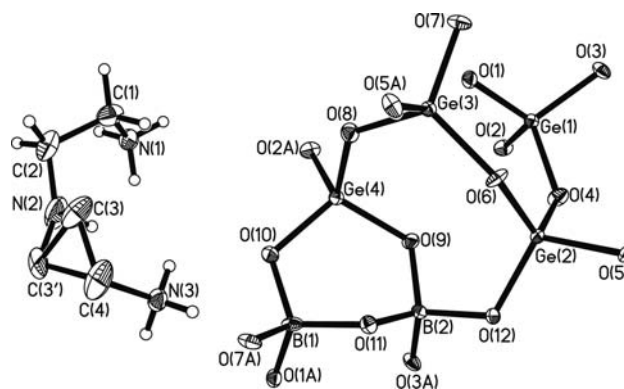

**Figure S3.** The ORTEP view of the coordination environments for Ge and B atoms in **FJ-17**, with 50% thermal ellipsoids and the atom-labeling scheme.

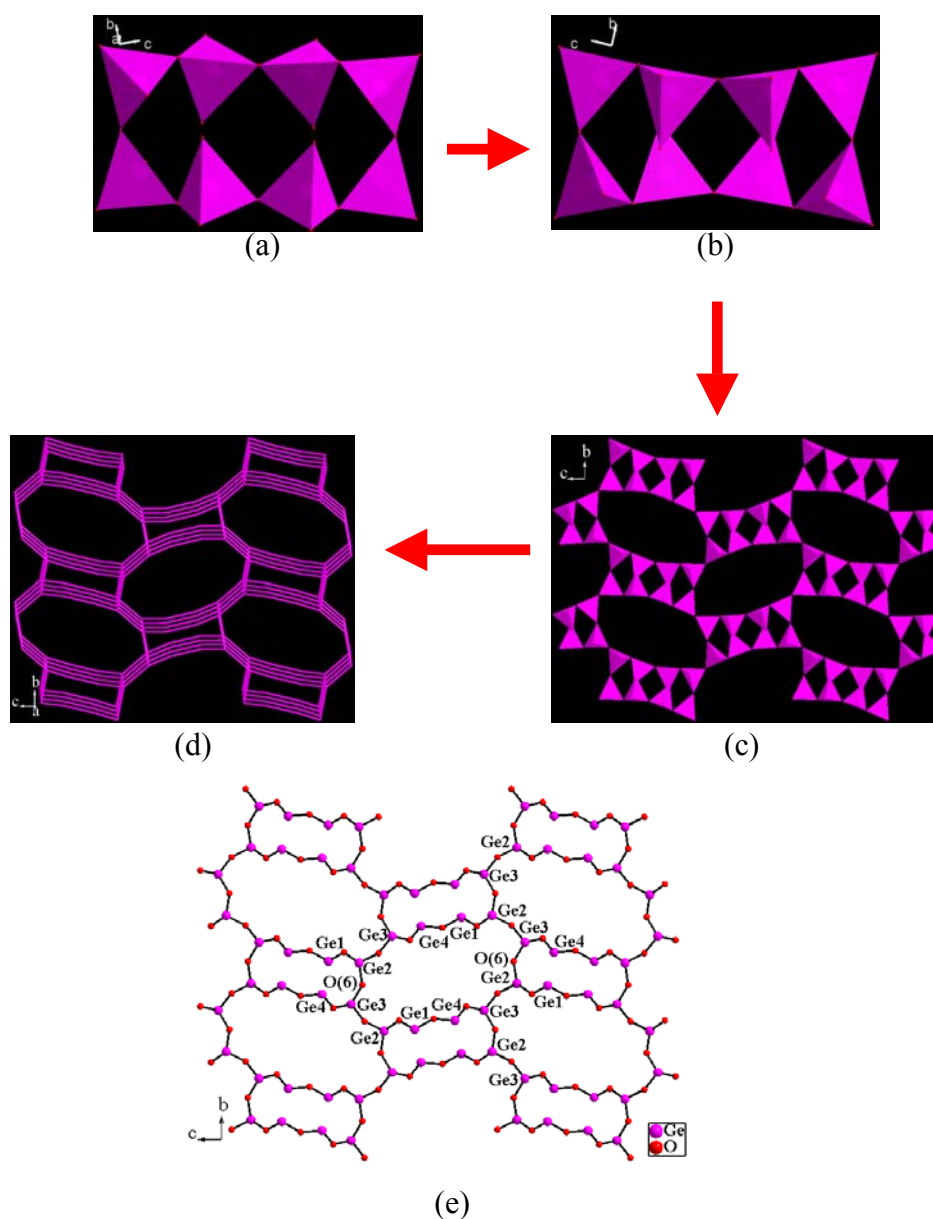

**Figure S4.** (a) and (b) View of the 8-ring of  $\text{Ge}_8\text{O}_{24}$  cluster along different directions; (c) View of the  $\{\text{Ge}_8\text{O}_{24}\}_n$  layer with 8,12-net along the [100] direction; (d) The topology of the  $\{\text{Ge}_8\text{O}_{24}\}_n$  layer along the [100] direction. (e) View of the  $\{\text{Ge}_8\text{O}_{24}\}_n$  layer with 8,12-net (some O atoms in  $\text{GeO}_4$  group are omitted for clarity)

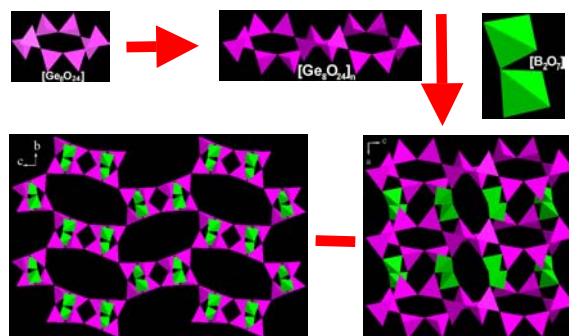

**Figure 5.** Schematic representation of the structure of **FJ-17**, showing the formation  $\text{Ge}_8\text{O}_{24}$  cluster to  $\{\text{Ge}_8\text{O}_{24}\}_n$  layer and  $\{(\text{BO}_2)_4(\text{GeO}_2)_8\}_n$  framework along the  $a$  (left) and  $b$  (right) axis, respectively.

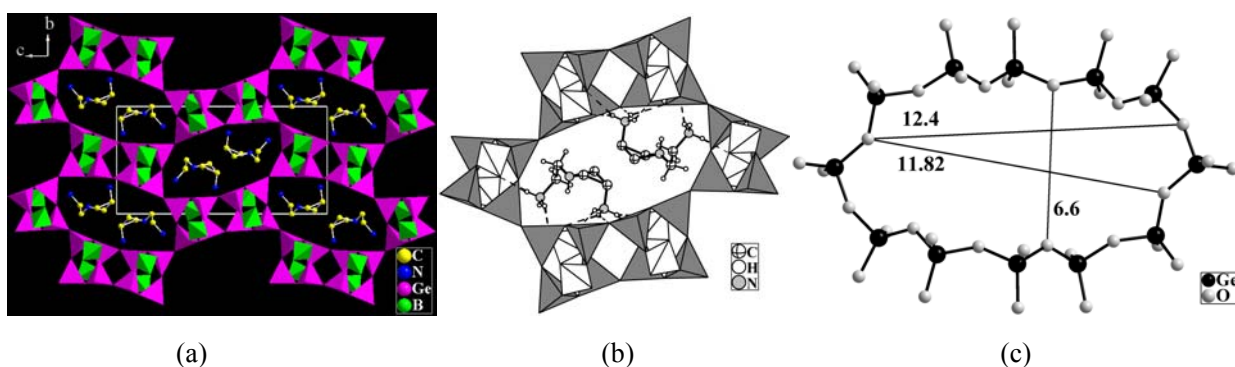

**Figure S6.** (a) View of the framework of  $\{[\text{BO}_2]_4[\text{GeO}_2]_8\}_n$  along the  $[100]$  direction in **FJ-17**, showing 12-rings large channels located by organic templates. (b) View the H-bonds interactions between the organic templates and the oxygen atoms from the inorganic frameworks. The important H-bonds are list in [Table S1](#). (c) The 12-rings structure in **FJ-17** viewed down  $[100]$  with selected  $\text{O}\cdots\text{O}$  distances noted.

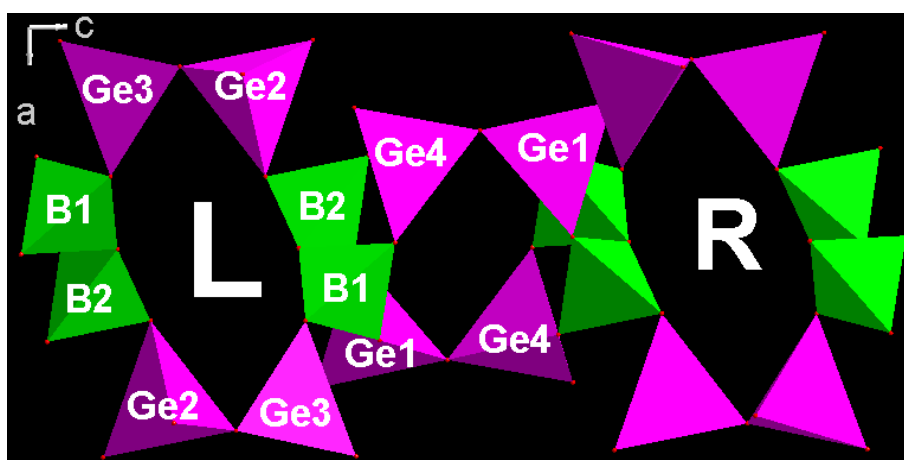

**Figure S7.** View of the left- and right-handed helical channels linked each other through the  $\text{Ge}_2\text{O}_7$  dimeric cluster units containing Ge1 and Ge4 atoms.

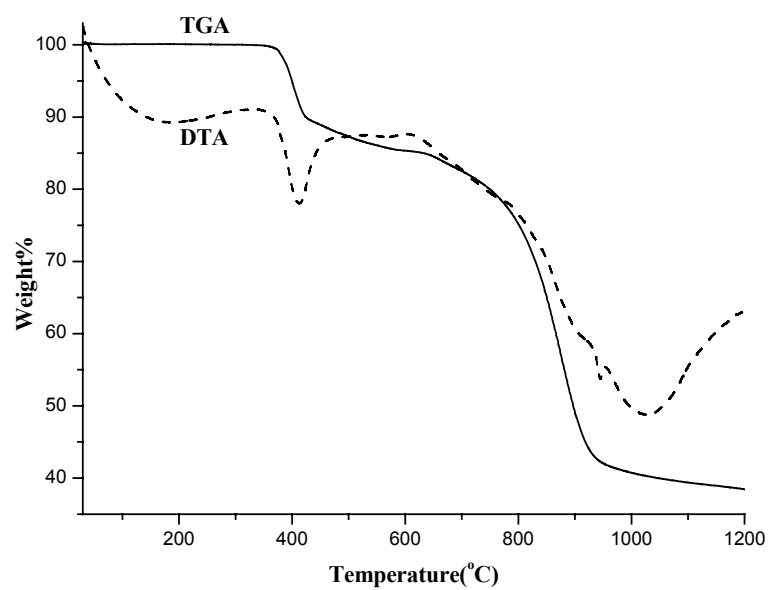

**Figure S8.** TG-DTA curve of **FJ-17** under N<sub>2</sub> atmosphere.
